LATE BREAKING

LTBK-01. INO-5401 AND INO-9012 DELIVERED INTRAMUSCULARLY (IM) WITH ELECTROPORATION (EP) IN COMBINATION WITH CEMIPIMAB (REGN2810) IN NEWLY DIAGNOSED GLIOBLASTOMA

David A. Reardon<sup>1</sup>, Steven Brem<sup>2</sup>, Arati Suvas Desai<sup>2</sup>, Stephen Joseph Bagley<sup>2</sup>, Sylvia Christine Kurz<sup>3</sup>, Macarena Ines De La Fuente<sup>4</sup>, Seema Nagpal<sup>5</sup>, Mary Roberta Welch<sup>6</sup>, Adilia Hormigo<sup>7</sup>, Peter Forsyth<sup>8</sup>, Jacob Mandell<sup>9</sup>, Simon Khagi<sup>10</sup>, Robert Aiken<sup>11</sup>, Tobias Walbert<sup>12</sup>, Frank Lieberman<sup>13</sup>, Jana Portnow<sup>14</sup>, James Batiste<sup>15</sup>, Nicholas Carroll<sup>16</sup>, Albert Sylvester<sup>16</sup>, Patricia Campbell<sup>16</sup>, Israel Lowy<sup>17</sup>, Alex Dolgoter<sup>18</sup>, Jean Boyer<sup>16</sup>, Kimberly Kraynyak<sup>16</sup>, Matthew P Morrow<sup>16</sup>, Trevor McMullan<sup>16</sup>, David B. Weiner<sup>16,19</sup>, and Jeffrey Skolnik<sup>16</sup>; <sup>1</sup>Dana-Farber Cancer Institute and Harvard Medical School, Boston, MA, USA, <sup>2</sup>University of Pennsylvania, Philadelphia, PA, USA, <sup>3</sup>NYU Langone Health, New York, NY, USA, <sup>4</sup>Sylvester Comprehensive Cancer Center, University of Miami, Miami, FL, USA, <sup>5</sup>Stanford University, Stanford, CA, USA, <sup>6</sup>Columbia University, New York, NY, USA, <sup>7</sup>Icahn School of Medicine at Mount Sinai, New York, NY, USA, <sup>8</sup>Moffitt Cancer Center, Tampa, FL, USA, <sup>9</sup>Baylor College of Medicine, Houston, TX, USA, <sup>10</sup>University of North Carolina, Chapel Hill, NC, USA, <sup>11</sup>UMDNJ, Rutgers, NJ, USA, <sup>12</sup>Henry Ford Cancer Institute, Detroit, MI, USA, <sup>13</sup>UPMC Cancer Center, Pittsburgh, PA, USA, <sup>14</sup>City of Hope, Los Angeles, CA, USA, <sup>15</sup>Sarah Cannon Research Institute, Chattanooga, TN, USA, <sup>16</sup>Inovio Pharmaceuticals, Plymouth Meeting, PA, USA, <sup>17</sup>Regeneron Pharmaceuticals, Inc., Tarrytown, NY, USA, <sup>18</sup>Inovio, San Diego, CA, USA, <sup>19</sup>The Wistar Institute, Philadelphia, PA, USA

**BACKGROUND:** Novel T cell-enabling therapies, in combination with checkpoint inhibition, may improve OS in GBM. INO-5401 (synthetic DNA plasmids encoding hTERT, WT-1, PSMA) plus INO-9012 (synthetic DNA plasmid encoding IL-12), and the PD-1 immune checkpoint inhibitor cemiplimab, is given to patients with newly diagnosed GBM to evaluate tolerability, efficacy and immunogenicity. **METHODS:** Phase I/II, single arm, 2 cohort study (A: MGMT unmethylated, B: MGMT methylated). Primary endpoint is safety; efficacy and immunogenicity are secondary. Nine mg INO-5401 plus 1 mg INO-9012 (every 3 weeks x 4 doses, then Q9W) is given IM with EP by CELLECTRA® 2000 with cemiplimab (350 mg IV Q3W). RT is given as 40 Gy over 3 weeks. TMZ is given with radiation (all patients), and adjuvantly (Cohort B only). **RESULTS:** Fifty-two subjects enrolled: 32 in Cohort A; 20 in Cohort B. 35% women; median age 60 years (19–78 years). The adverse event profile is consistent with single-agent (INO-5401, INO-9012, EP and cemiplimab) reported events. OS at 12 months was 84.4% (Cohort A) and 85% (Cohort B). OS at 18 months in Cohort A is 50% (95% CI 31.9 - 68.1); median OS is 17.9 months (14.5 - NR); Cohort B OS18 and median OS will be presented. Tumor gene transcripts at diagnosis confirmed expression of INO-5401 antigens. Peripheral immune responses following INO-5401 revealed antigen-specific T cell responses by Interferon gamma ELISpot and flow cytometry, including cytokine production and expansion of antigen specific CD8+T cells with lytic

potential. **CONCLUSIONS:** INO-5401 + INO-9012, a novel DNA plasmid immunotherapy, demonstrates acceptable risk/benefit and generates robust systemic immune responses to encoded tumor antigens when administered with cemiplimab and RT/TMZ in newly diagnosed GBM patients. Overall survival is encouraging. Clinical trial information: NCT03491683.

LTBK-04. PHASE 2 MULTICENTER STUDY OF THE ONCOLYTIC ADENOVIRUS DNX-2401 (TASADENOTUREV) IN COMBINATION WITH PEMBROLIZUMAB FOR RECURRENT GLIOBLASTOMA; CAPTIVE STUDY (KEYNOTE-192)

Gelareh Zadeh<sup>1</sup>, Mariza Daras<sup>2</sup>, Timothy F. Cloughesy<sup>3</sup>, Howard Colman<sup>4</sup>, Priya U. Kumthekar<sup>5</sup>, Clark C. Chen<sup>6</sup>, Robert Aiken<sup>7</sup>, Morris D. Groves<sup>8</sup>, Shirley Ong<sup>9</sup>, Rohan Ramakrishna<sup>10</sup>, Michael A. Vogelbaum<sup>11</sup>, Simon Khagi<sup>12</sup>, Thomas Kaley<sup>2</sup>, Jason M. Melear<sup>8</sup>, David M. Peereboom<sup>13</sup>, Analiz Rodriguez<sup>14</sup>, Maxim Yankelevich<sup>7</sup>, Suresh G. Nair<sup>15</sup>, Vinay K. Puduvalli<sup>9</sup>, Farshad Nassiri<sup>1</sup>, Adam M. Sonabend<sup>5</sup>, Laura Agensky<sup>16</sup>, Brett Ewald<sup>16</sup>, Matteo Levisetti<sup>16</sup>, and Frederick F. Lang<sup>17</sup>; <sup>1</sup>Toronto Western Hospital, University Health Network, University of Toronto, Toronto, ON, Canada, <sup>2</sup>Memorial Sloan Kettering Cancer Center, New York, NY, USA, <sup>3</sup>University of California Los Angeles, Los Angeles, CA, USA, <sup>4</sup>Huntsman Cancer Institute, University of Utah, Salt Lake City, UT, USA, <sup>5</sup>Feinberg School of Medicine, Northwestern University, Chicago, IL, USA, <sup>6</sup>University of Minnesota, Minneapolis, MN, USA, <sup>7</sup>Rutgers Cancer Institute of New Jersey, New Brunswick, NJ, USA, <sup>8</sup>Texas Oncology Austin Brain Tumor Center, Austin, TX, USA, <sup>9</sup>The Ohio State University Wexner Medical Center, Columbus, OH, USA, <sup>10</sup>Weill Cornell Brain and Spine Center, New York, NY, USA, <sup>11</sup>Moffitt Cancer Center, Tampa, FL, USA, <sup>12</sup>University of North Carolina at Chapel Hill, Chapel Hill, NC, USA, <sup>13</sup>Cleveland Clinic, Cleveland, OH, USA, <sup>14</sup>University of Arkansas for Medical Sciences, Little Rock, AR, USA, <sup>15</sup>Lehigh Valley Health Network, Allentown, PA, USA, <sup>16</sup>DNATrix, Houston, TX, USA, <sup>17</sup>The University of Texas MD Anderson Cancer Center, Houston, TX, USA.

**BACKGROUND:** A Phase 2 multi-center study was conducted to evaluate the replication-competent oncolytic adenovirus, DNX-2401 (tasadenoturev), in combination with the anti-PD-1 antibody, pembrolizumab, in subjects with recurrent glioblastoma. **METHODS:** Subjects  $\geq$  18 years with glioblastoma at first or second recurrence were treated with a single intratumoral injection of 5e8-5e10 vp DNX-2401 at the time of biopsy, followed by 200 mg pembrolizumab infusions every 3 weeks until progression or toxicity. **RESULTS:** Forty-nine subjects were enrolled at first (79.6%) or second (20.4%) recurrence after prior surgery (89.8%), radiotherapy (100%), and temozolomide (100%). Forty-eight of 49 (98%) were treated with 5e8 vp (n=3), 5e9 vp (n=3), or 5e10 vp (n=42) DNX-2401 and pembrolizumab. Median treatment duration was 7 cycles (range 1–35) with one subject remaining on treatment (cycle 31). Adverse events were primarily mild to moderate, consistent with underlying disease, and manageable. Headache, brain edema, and fatigue are the most common events reported as related to the treatment regimen. Of subjects treated with full dose DNX-2401 and pembrolizumab (n=42), 5 subjects (11.9%) had confirmed responses, including 2 durable ongoing complete responses and 3 partial responses. One subject remains tumor free > 12 months after completing the planned 24 months of pembrolizumab. Median overall survival was 12.5 months; OS-12 and OS-18 were 54.5% and 20.8%, respectively. Four subjects, all of which have survived more than 21 months, continue to be followed for survival. **CONCLUSIONS:** DNX-2401 plus pembrolizumab provides encouraging activity and is safe in patients with recurrent glioblastoma. A global, randomized, controlled Phase 3 study is planned.
